# Supplementary material
Source: Springer Nature journal article supplement (https://www.springermedizin.de/resource/supplementary/12874_2011_813_MOESM2_ESM.pdf/9432906)

Distribution: normal

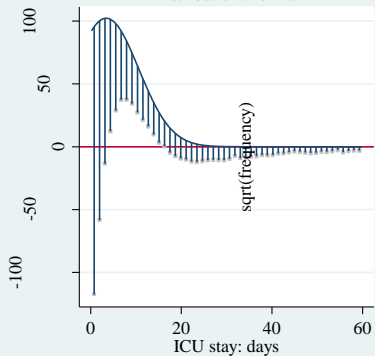

Distribution: lognormal

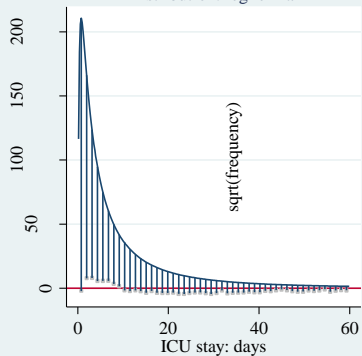

Distribution: gamma

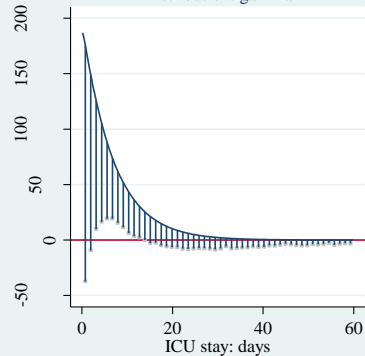

Distribution: inverse gaussian

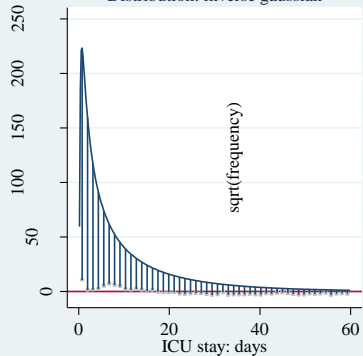

Distribution: normal

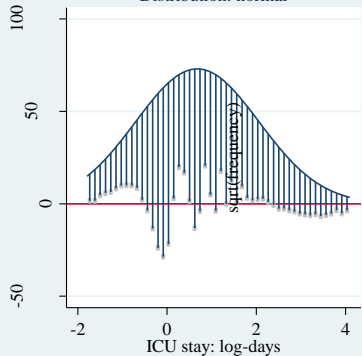

Distribution: normal

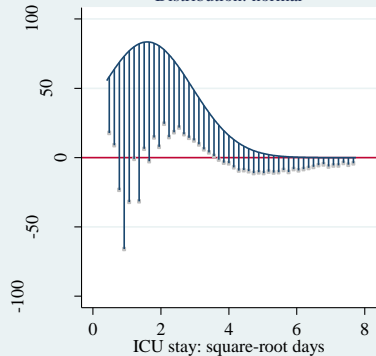

Supplement: MOESM2 [file 9432906]
